# Supplementary material for: Fluoride-free self-templated synthesis of hollow TiO2 nanostructures for hydrogen evolution
Source: Royal Society of Chemistry journal article supplement (doi:10.1039/c2ce25375e), 2012-01-01
Supplement: c2ce25375e.pdf [file c2ce25375e.pdf]

## Supplementary Information

### Fluoride-free Self-templated Synthesis of Hollow TiO<sub>2</sub> Nanostructures for Hydrogen Evolution

Quang Duc Truong<sup>a,b,\*</sup>, Thanh Son Le<sup>c</sup> and Huu Thu Hoa<sup>c</sup>

<sup>a</sup>Department of Chemistry, National Tsing Hua University, Hsinchu 30013, Taiwan

<sup>b</sup>Institute of Multidisciplinary Research for Advanced Materials, Tohoku University, Sendai  
980-8577, Japan.

<sup>c</sup>Department of Chemistry, Vietnam National University, Hanoi, Vietnam

<sup>†</sup>To whom correspondence should be addressed:

Email: tqduc@mail.tagen.tohoku.ac.jp. Tel./fax: +81-22-217-5651.

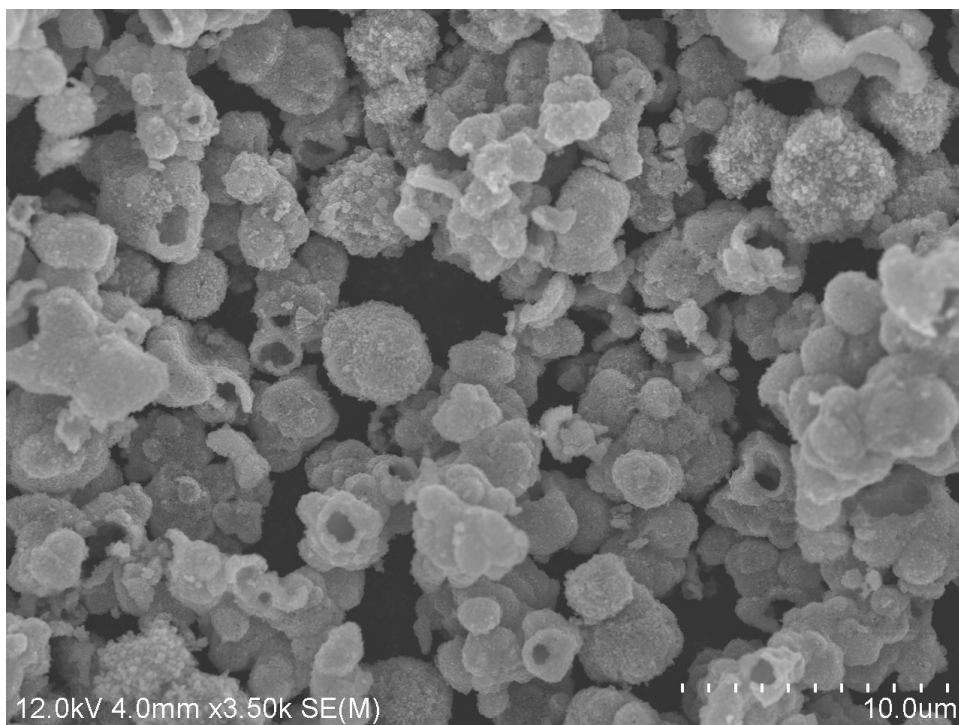

**Fig. S1** SEM image TiO<sub>2</sub> nanostructures synthesized by hydrothermal treatment of Ti(SO<sub>4</sub>)<sub>2</sub> in the presence of H<sub>2</sub>O<sub>2</sub> with pre-treatment at 353 K for 1 day to remove gas bubbles.

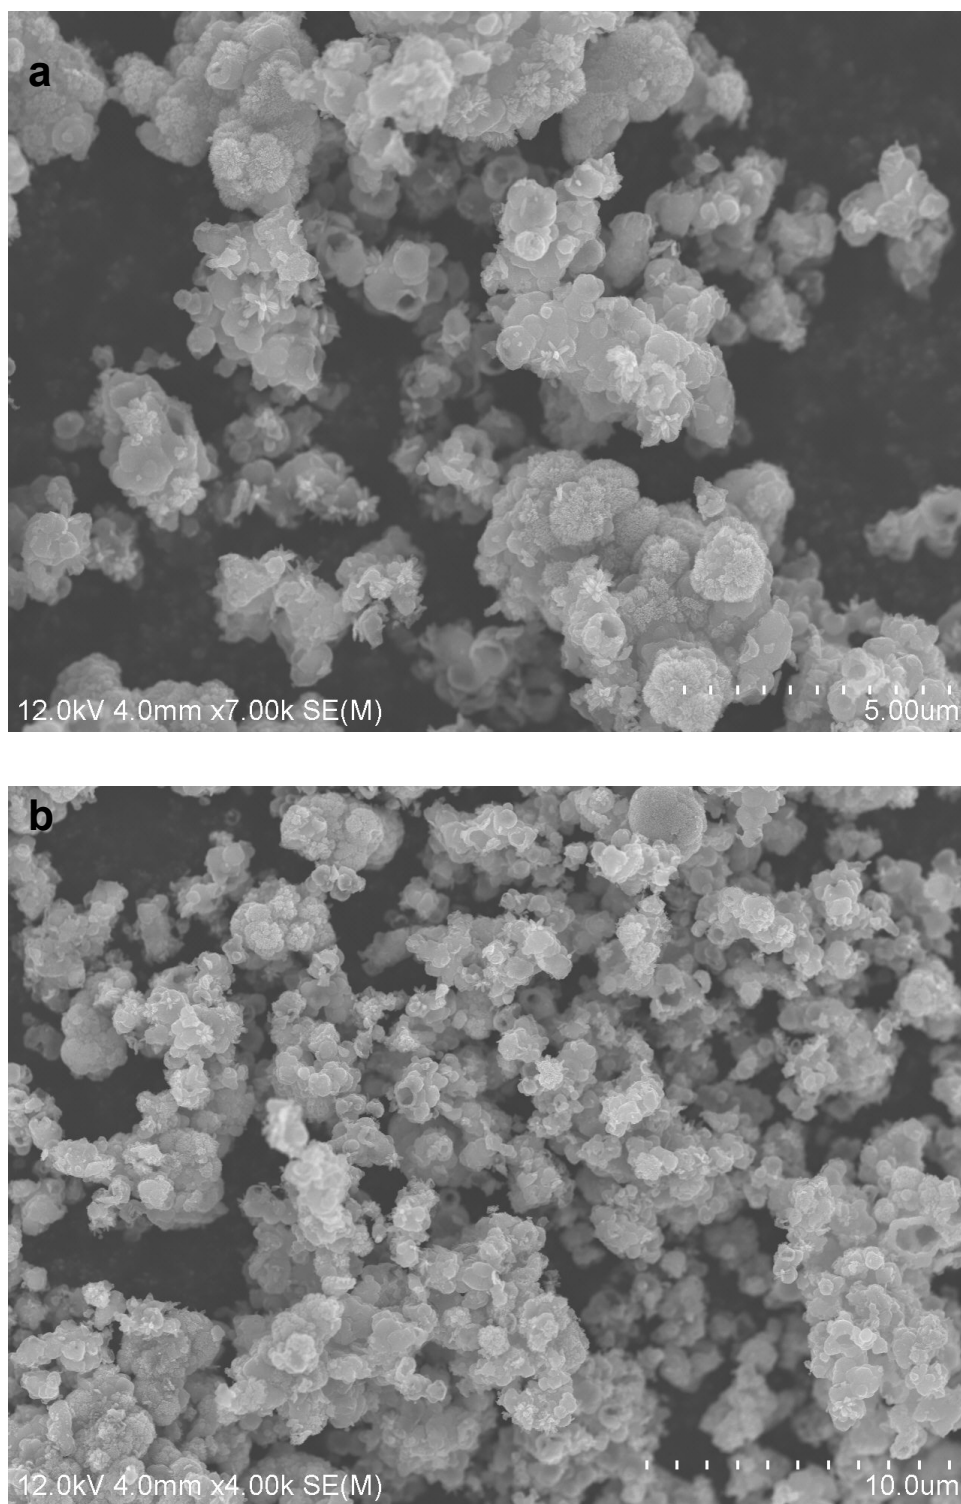

**Fig. S2** SEM images of TiO<sub>2</sub> nanostructures synthesized by hydrothermal treatment of Ti(SO<sub>4</sub>)<sub>2</sub> in the presence of small amount of H<sub>2</sub>O<sub>2</sub>: (a) 4 mmol and (b) 6 mmol.

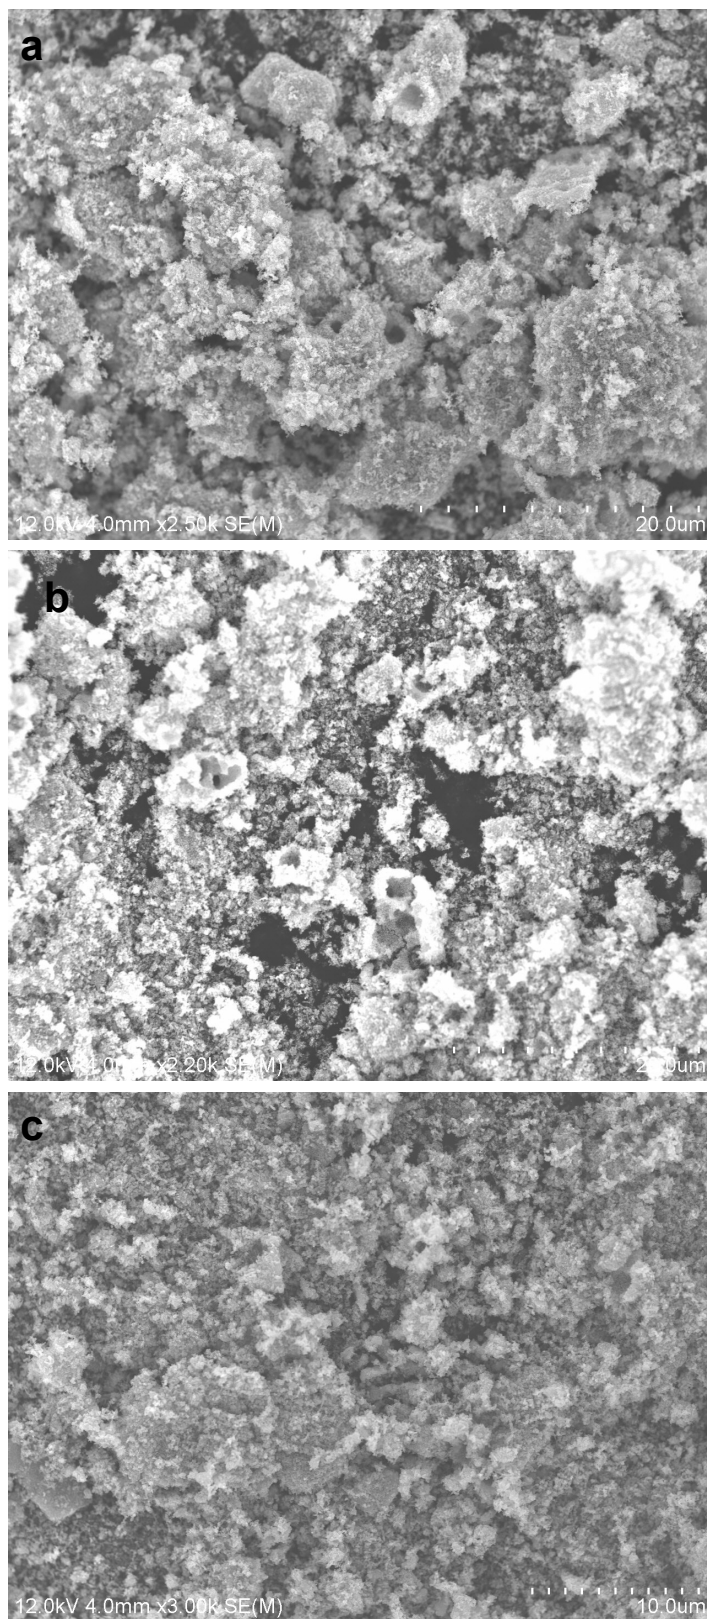

**Fig. S3** SEM images of  $\text{TiO}_2$  nanostructures synthesized by hydrothermal treatment of  $\text{Ti}(\text{SO}_4)_2$  in the presence of larger amount of  $\text{H}_2\text{O}_2$ : (a) 20 mmol, (b) 30 mmol and (c) 50 mmol.

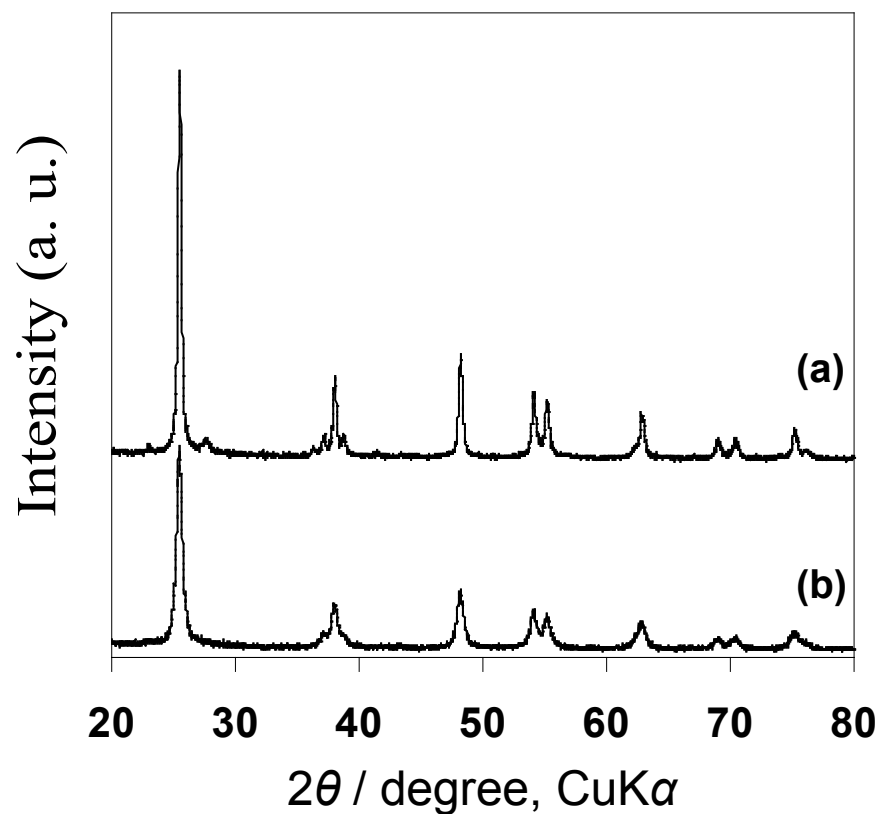

**Fig. S4** XRD pattern of TiO<sub>2</sub> nanostructures synthesized (a) with H<sub>2</sub>O<sub>2</sub> (10 mmol) and (b) without H<sub>2</sub>O<sub>2</sub>.
